# Supplementary material for: Stability and structure of the aqueous LiTFSI–LiCl interface
Source: Royal Society of Chemistry journal article supplement (doi:10.1039/d4fd00026a), 2024-01-01
Supplement: d4fd00026a1.pdf [file d4fd00026a1.pdf]

## Stability and Structure of the Aqueous LiTFSI-LiCl Interface: Supporting Information

Hannah O. Wood<sup>a</sup>, Hannah M. Burnett<sup>a</sup>, Robert A. W. Dryfe<sup>a</sup>, and Paola Carbone<sup>a</sup>

<sup>a</sup>Department of Chemistry, University of Manchester, Oxford Rd, Manchester, United Kingdom.

**Table S1** Potential energy parameters for Madrid, modified AMBER and TIP4P/2005 derived potentials for aqueous LiCl and LiTFSI solutions. Lennard-Jones energy and size parameters are denoted by  $\epsilon$  and  $\sigma$  respectively.

| Model          | Species         | $\epsilon$ (kJ/mol) | $\sigma$ (nm) | Charge ( $e$ ) |
|----------------|-----------------|---------------------|---------------|----------------|
| Madrid         | Li <sup>+</sup> | 0.435090            | 0.143970      | +0.85          |
| Madrid         | Cl <sup>-</sup> | 0.076923            | 0.469906      | -0.85          |
| Modified AMBER | O               | 0.878640            | 0.295992      | -0.466         |
| Modified AMBER | S               | 1.04600             | 0.356359      | +0.911         |
| Modified AMBER | N               | 0.711280            | 0.325000      | -0.598         |
| Modified AMBER | C               | 0.457730            | 0.339967      | +0.3165        |
| Modified AMBER | F               | 0.255224            | 0.311815      | -0.1405        |
| TIP4P/2005     | O               | 0.774900            | 0.315890      | 0              |
| TIP4P/2005     | H               | 0                   | 0             | +0.5564        |
| TIP4P/2005     | M               | 0                   | 0             | -1.1128        |

**Table S2** Concentration, the corresponding number of species, and simulation lengths of each aqueous LiTFSI and LiCl liquid-vapour system studied. All boxes are of dimensions 5 × 5 × 16 nm.

| Concentration (molal) | System | Li <sup>+</sup> | Cl <sup>-</sup> | TFSI <sup>-</sup> | H <sub>2</sub> O | NVT eq. (ns) | NVT pr. (ns) |
|-----------------------|--------|-----------------|-----------------|-------------------|------------------|--------------|--------------|
| 1                     | LiCl   | 75              | 75              | -                 | 4169             | 60           | 60           |
| 1                     | LiTFSI | 75              | -               | 75                | 4182             | 500          | 100          |
| 10                    | LiCl   | 745             | 745             | -                 | 4139             | 60           | 60           |
| 10                    | LiTFSI | 322             | -               | 322               | 1789             | 900          | 100          |
| 20                    | LiCl   | 1490            | 1490            | -                 | 4139             | 120          | 120          |
| 20                    | LiTFSI | 397             | -               | 397               | 1103             | 900          | 100          |

**Table S3** Number of species and simulation lengths for biphasic LiCl-LiTFSI systems at various concentrations. Simulation box dimensions are 5 × 5 × 10 nm.

| Concentration (molal) | Li <sup>+</sup> | Cl <sup>-</sup> | TFSI <sup>-</sup> | H <sub>2</sub> O | NPT eq. (ns) | NVT pr. (ns) |
|-----------------------|-----------------|-----------------|-------------------|------------------|--------------|--------------|
| 10                    | 1607            | 745             | 322               | 5928             | 1200         | 60           |
| 13                    | 1320            | 968             | 352               | 5643             | 1200         | 60           |
| 16                    | 1562            | 1192            | 370               | 5424             | 1200         | 60           |
| 20                    | 1887            | 1490            | 397               | 5242             | 1200         | 60           |

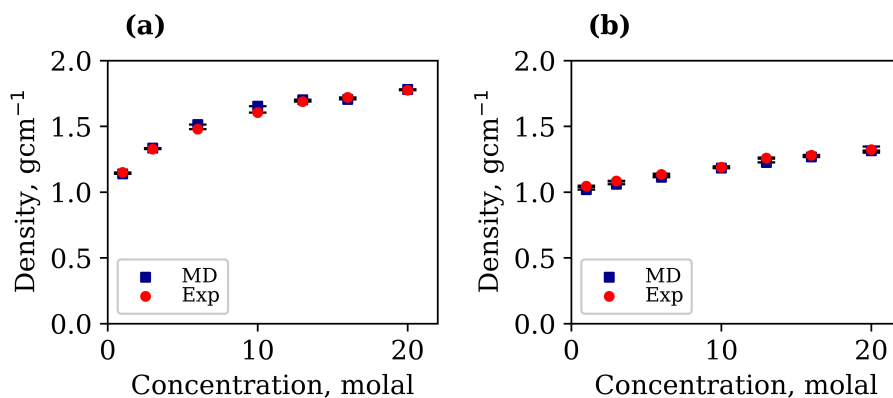

**Figure S1** Calculated (blue) and experimentally measured (red) densities of aqueous LiTFSI (a) and LiCl (b) systems of different concentrations between 1 molal and 20 molal, measured at 294.15 K and 1 atm, with the corresponding error bars.

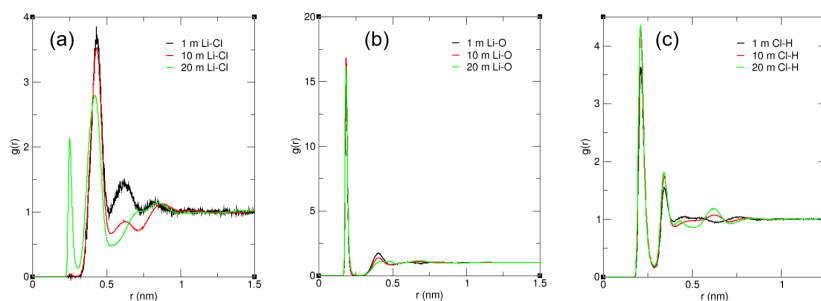

**Figure S2** Radial distribution functions of (a)  $\text{Li}^+$  with  $\text{Cl}^-$ , (b)  $\text{Li}^+$  with O (water), and (c)  $\text{Cl}^-$  with H (water), all shown for the 1 molal LiCl aqueous system (black), the 10 molal system (red) and the 20 molal system (green).

**Table S4** Coordination number of  $\text{Li}^+$  ions with water and  $\text{Cl}^-$  ions, using a first solvation sphere radius of 0.25 nm from the centre of the  $\text{Li}^+$  ion.

| Concentration (molal) | Li-Cl CN | Li- $\text{H}_2\text{O}$ CN |
|-----------------------|----------|-----------------------------|
| 1                     | 0        | 3.999                       |
| 10                    | 0.001    | 3.992                       |
| 20                    | 0.159    | 3.496                       |

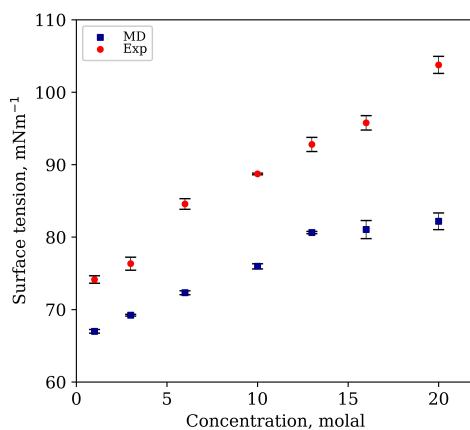

**Figure S3** Calculated (blue) and experimentally measured (red) surface tensions with respective errors in  $\text{mN/m}$  of LiCl-vapour systems of 1, 3, 6, 10, 13, 16 and 20 molal

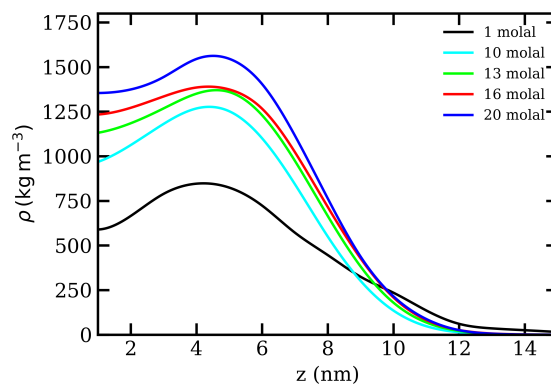

**Figure S4** Density profiles of  $\text{TFSI}^-$  molecules in the 1 (black), 10 (cyan), 13 (green), 16 (red) and 20 (blue) molal  $\text{LiTFSI}(\text{aq})$ -vapour systems in the interfacial region. Profiles are aligned with respect to the Gibbs dividing surface of each system by shifting in the  $z$ -direction.

**Table S5** Surface excess (molecules  $\text{nm}^{-2}$ ) of TFSI<sup>-</sup> anions with respect to the Gibbs dividing surface of water calculated using a hyperbolic tangent fit of the TFSI<sup>-</sup> density profile for each system, where liquid-vapour systems are denoted 'LV' and liquid-liquid systems are denoted 'LL'.

| System       | Surface excess, molecules $\text{nm}^{-2}$ |
|--------------|--------------------------------------------|
| 1 molal L/V  | 0.446                                      |
| 10 molal L/V | 0.319                                      |
| 13 molal L/V | 0.237                                      |
| 16 molal L/V | 0.338                                      |
| 20 molal L/V | 0.239                                      |
| 10 molal L/L | -0.054                                     |
| 13 molal L/L | -0.041                                     |
| 16 molal L/L | -0.003                                     |
| 20 molal L/L | -0.014                                     |

**Table S6** Experimental interfacial tension measurements for LiCl-LiTFSI biphasic systems of concentrations between 10 and 20 molal.

| Conc. LiTFSI (molal) | Conc. LiCl (molal) | Interfacial tension (mN/m) | Error (mN/m) |
|----------------------|--------------------|----------------------------|--------------|
| 10                   | 10                 | 1.1189                     | 0.0242       |
| 13                   | 10                 | 1.4874                     | 0.0269       |
| 16                   | 10                 | 1.6406                     | 0.0351       |
| 20                   | 10                 | 2.0416                     | 0.0153       |
| 10                   | 13                 | 2.4411                     | 0.1031       |
| 13                   | 13                 | 3.2739                     | 0.0425       |
| 16                   | 13                 | 3.6189                     | 0.0086       |
| 20                   | 13                 | 4.1059                     | 0.0343       |
| 10                   | 16                 | 3.2611                     | 0.0475       |
| 13                   | 16                 | 4.5274                     | 0.19         |
| 16                   | 16                 | 5.0131                     | 0.0347       |
| 20                   | 16                 | 5.8608                     | 0.0686       |
| 10                   | 20                 | 4.4394                     | 0.2027       |
| 13                   | 20                 | 5.9915                     | 0.2099       |
| 16                   | 20                 | 6.841                      | 0.0455       |
| 20                   | 20                 | 8.3581                     | 0.0968       |

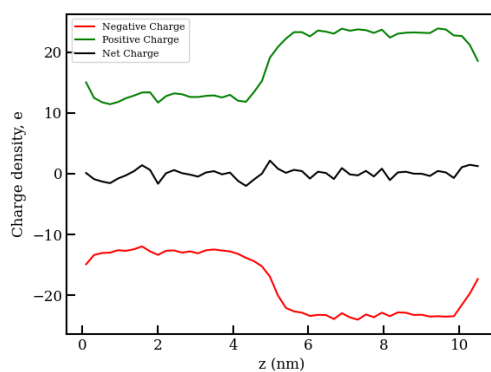

**Figure S5** Charge density profile of positive (green), negative (red) and net (black) charge as a function of  $z$  position in nm, in the 10 molal LiCl-LiTFSI biphasic system.

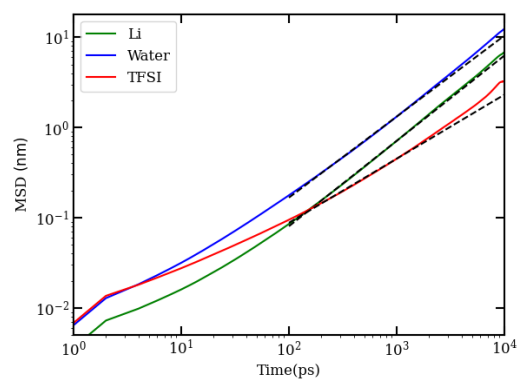

**Figure S6** Mean square displacement against time of  $\text{Li}^+$  (green),  $\text{TFSI}^-$  (red) and water (black) in the 10 molal  $\text{LiCl-LiTFSI}$  biphasic system. The dashed lines indicate free diffusion. Data beyond  $10^4$  ps are affected by statistical error.

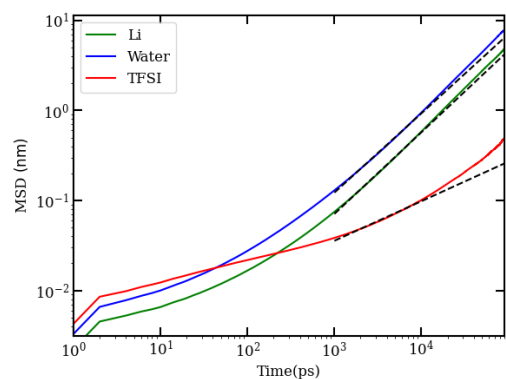

**Figure S7** Mean square displacement against time of  $\text{Li}^+$  (green),  $\text{TFSI}^-$  (red) and water (black) in the 20 molal  $\text{LiCl-LiTFSI}$  biphasic system. The dashed lines indicate free diffusion. Data beyond  $10^4$  ps are affected by statistical error.
